# Supplementary material
Source: publisher figshare collection journal article supplement (https://acs.figshare.com/ndownloader/files/24724301)
Supplement: Supplementary file 1 [file 24724301]

# **Supporting Information for: Tracing the consumption origins of wastewater and sludge for a Chinese city based on waste input-output analysis**

**Lishan XIAO<sup>1</sup>, Chen LIN<sup>2\*</sup>, Shinichiro NAKAMURA<sup>3</sup>**

1 School of Environmental and Geographical Sciences, Shanghai Normal University, Shanghai, 200234, China

2 School of Applied Economics, Renmin University of China, Beijing, 100872, China

3 Faculty of Political Science and Economics, Waseda University, Tokyo 169-8050, Japan

Corresponding author, Email: c\_lin@ruc.edu.cn

**Number of pages: 22, Number of tables: 9, Number of figures: 2**

## Contents

|                                                                                                                     |            |
|---------------------------------------------------------------------------------------------------------------------|------------|
| <b>1 Current state of wastewater and sludge treatment in China sludge growth, laws, and policies in China .....</b> | <b>S4</b>  |
| <b>2 Methodology .....</b>                                                                                          | <b>S5</b>  |
| 2.1 The W <sup>2</sup> IO model .....                                                                               | S5         |
| 2.2 The W <sup>2</sup> IO table and other data .....                                                                | S8         |
| 2.3 Scenario analysis .....                                                                                         | S15        |
| 2.4 Sensitivity analysis .....                                                                                      | S16        |
| <b>3 Results .....</b>                                                                                              | <b>S17</b> |
| 3.1 Wastewater and sludge footprint by final demand categories .....                                                | S17        |
| 3.2 Direct discharge versus footprint .....                                                                         | S17        |
| 3.3 Sensitivity analysis.....                                                                                       | S17        |
| 3.4 Transboundary impacts.....                                                                                      | S21        |
| <b>References .....</b>                                                                                             | <b>S21</b> |

## List of Figures

|                                                                                   |     |
|-----------------------------------------------------------------------------------|-----|
| Figure S1 Wastewater and sludge footprint by final demand categories.....         | S17 |
| Figure S2 Direct discharge versus W <sup>2</sup> F of the largest 40 sectors..... | S17 |

## List of Tables

|                                                        |    |
|--------------------------------------------------------|----|
| Table S1 Framework of the W <sup>2</sup> IO table..... | S6 |
|--------------------------------------------------------|----|

|                                                                                                                       |     |
|-----------------------------------------------------------------------------------------------------------------------|-----|
| Table S2 Production sector classification: Xiamen IO table.....                                                       | S8  |
| Table S3 The allocation matrix $S$ of waste/wastewater to treatment<br>processes.....                                 | S12 |
| Table S4 The $W^2IO$ table of Xiamen based on the framework in Table 1.....                                           | S13 |
| Table S5 COD and wastewater discharge.....                                                                            | S14 |
| Table S6 Data on food (diet, toilet discharge, and carbon content) .....                                              | S15 |
| Table S7 Sensitivity elasticity of pre-consumption $W^2F$ and $SF$ to input and waste<br>generation coefficients..... | S18 |
| Table S8 Sensitivity elasticity of post-consumption $W^2F$ and $SF$ with respect to key<br>parameters.....            | S20 |
| Table S9 Wastewater and sludge embodied in trade.....                                                                 | S21 |

# 1 The current state of wastewater and sludge treatment in China

China has the second-highest wastewater treatment capacity in the world <sup>1</sup>, with 5222 wastewater treatment plants to treat  $2.28 \times 10^8 \text{ m}^3$  wastewater every day in 2018. The sludge in China was 11.7 million tons in 2018, with an average annual growth rate of 10% from 2011-2018. Sludge is treated by landfilling (50%), incineration (10%), materials recycling (9%), and composting (16%)<sup>1</sup>. Although landfills accounted for the largest part of sludge treatment, it is not a favorable solution in the future. The water content of the sludge for landfills should be less than 60% after 2007 <sup>2</sup>. As a result, a large amount of landfilled sludge cannot meet the new requirements and thus is disposed of improperly<sup>3</sup>. Given that 80% of landfills cannot meet the national standard, only about 45% of the sludge is properly treated at present.

Sludge for land use and incineration have been recommended as the best available technologies<sup>4</sup>. Sludge treatment should be compatible with technology, economic development level, and environmental management requirement for different application conditions. Furthermore, the **zero-waste** city plan further proposed to minimize the amount of landfills and ultimately realize the full utilization of waste<sup>5</sup>. In 2020, The latest revision of the **Solid Waste Prevention and Control Law** confirmed that sludge treatment facilities should be incorporated into the urban wastewater treatment plan. China is in a transition period with respect to wastewater and sludge management from end-pipe disposal to waste-to-resource management.

## 2 Methodology

### 2.1 The W<sup>2</sup>IO model

#### 2.1.1 Derivation of equation

A hybrid IO model was produced to examine both the generation and treatment of wastewater, as an extension of the WIO in Nakamura and Kondo (2009)<sup>6</sup>. The framework of W<sup>2</sup>IO is presented in Table S1. Let there be  $n$  producing sectors,  $k$  waste/wastewater treatment sectors, and  $m$  types of waste/wastewater. The  $n \times n$  matrix,  $X_p$ , refers to the intermediate input flows in the economic (goods and services producing) sectors, the  $n \times k$  matrix  $X_T$  to the input from the economic sectors to the treatment sectors, the  $n \times f$  matrix  $Y_p$  to the final demand for goods and services, the  $k \times f$  matrix  $Y_w$  to the final demand for wastewater, sludge and ash, and  $W_p$  and  $W_T$  to the direct flows of wastewater, sludge and ash resulting from the producing and treatment sectors, respectively. The  $n \times 1$  vector  $x_p$  refers to the activity levels of economic sectors, and the  $k \times 1$  vector,  $x_T$ , the activity level of wastewater treatment sectors.

Table S1 includes three wastewater treatment processes, namely, oxidation ditch (OD), anaerobic/anoxic/oxic(A2/O) processes, and biological aerated filter (BF), two dewatering processes, i.e., mechanical dewatering with centrifugal dewatering equipment (hereafter termed Dew 80) that reduces water content from 96% to around 80%, and plate-frame pressure filtration (hereafter termed Dew 60) that combines mechanical dewatering with chemical methods and reduces the water content to below 60%, and three types of sludges, which are raw sludge (Sludge 90) from the wastewater treatment process with water content above 90%, Sludge 80 with water content less than 80% obtained by subjecting Sludge 90 to Dew 80, and Sludge 60 with water content less than 60% obtained by subjecting Sludge 90 to Dew 60. The treatment options for dewatered wet sludge include landfill, incineration, and composting.

**Table S1 Framework of the W<sup>2</sup>IO table**

|                                 | Economic sectors      |         | Wastewater treatment sectors (k) |    |     |                  |       |           |              | Final demand (f) |                   |                        |         | Output |
|---------------------------------|-----------------------|---------|----------------------------------|----|-----|------------------|-------|-----------|--------------|------------------|-------------------|------------------------|---------|--------|
| Economic sectors                | Production sectors(n) | Compost | Wastewater treatment             |    |     | Sludge treatment |       |           |              | Consumption      | Capital formation | Government expenditure | Exports |        |
|                                 | 1,2 ...139            |         | A2O                              | OD | BAF | Dew 1            | Dew 2 | Land fill | Incineration |                  |                   |                        |         |        |
| 1<br>2<br>...<br>139<br>Compost | $X_P$                 |         | $X_T$                            |    |     |                  |       |           |              | $Y_P$            |                   |                        |         | $x_P$  |
| Waste/wastewater (m)            |                       |         |                                  |    |     |                  |       |           |              |                  |                   |                        |         |        |
| Wastewater (t)                  | $W_P$                 |         | $W_T$                            |    |     |                  |       |           |              | $Y_W$            |                   |                        |         | $x_W$  |
| Sludge 90 (t)                   |                       |         |                                  |    |     |                  |       |           |              |                  |                   |                        |         |        |
| Sludge 80 (t)                   |                       |         |                                  |    |     |                  |       |           |              |                  |                   |                        |         |        |
| Sludge 60 (t)                   |                       |         |                                  |    |     |                  |       |           |              |                  |                   |                        |         |        |
| Ash (t)                         |                       |         |                                  |    |     |                  |       |           |              |                  |                   |                        |         |        |

The balancing equations of products and waste are given by:

$$\sum_{j=1}^n (X_P)_{ij} + \sum_{j=1}^k (X_T)_{ij} + \sum_{j=1}^k (Y_P)_{ij} = (x_P)_i \quad (S1)$$

$$\sum_{j=1}^n (W_P)_{ij} + \sum_{j=1}^k (W_T)_{ij} + \sum_{j=1}^k (Y_W)_{ij} = (x_W)_i \quad (S2)$$

The matrix of input coefficients,  $A$ 's, and wastewater generation coefficients,  $G$ 's, are given by:

$$A_P = X_P \widehat{X_P}^{-1}, \quad A_T = X_T \widehat{X_T}^{-1}, \quad G_P = W_P \widehat{W_P}^{-1}, \quad \text{and} \quad G_T = W_T \widehat{W_T}^{-1},$$

where  $\widehat{\phantom{x}}$  refers to the diagonalized matrix of the variable it attaches. Using these matrices, (S1) and (S2) can be rewritten as:

$$\sum_{j=1}^n (A_P)_{ij} (x_P)_j + \sum_{j=1}^k (A_T)_{ij} (x_T)_j + \sum_{j=1}^k (Y_P)_{ij} = (x_P)_i \quad (S3)$$

$$\sum_{j=1}^n (G_P)_{ij} (x_P)_j + \sum_{j=1}^k (G_T)_{ij} (x_T)_j + \sum_{j=1}^k (Y_W)_{ij} = (x_W)_i \quad (S4)$$

or using matrix notations as:

$$\begin{pmatrix} A_P & A_T \\ G_P & G_T \end{pmatrix} \begin{pmatrix} x_P \\ x_T \end{pmatrix} + \begin{pmatrix} y_P \\ y_W \end{pmatrix} = \begin{pmatrix} x_P \\ x_W \end{pmatrix} \quad (S5)$$

This system is not solvable, because of the asymmetry; wastewater occurs on the right-hand side, while the levels of wastewater treatment occur on the left-hand side <sup>7-8</sup>. While the original form of (S5) is not solvable because of this reason, it can be transformed into a solvable symmetric one by establishing the allocation of different types of wastewater to different wastewater treatment processes <sup>7</sup> This allocation is represented by the allocation matrix  $S$  of order  $k \times m$ , where its  $i$ - $j$  element  $S_{ij}$  refers to the share of waste  $j$  that is allocated to the treatment process  $i$ .

By use of  $S$ , (S5) is transformed to a symmetric system in terms of goods production and wastewater treatment:

$$\begin{pmatrix} A_P & A_T \\ SG_P & SG_T \end{pmatrix} \begin{pmatrix} x_P \\ x_T \end{pmatrix} + \begin{pmatrix} y_P \\ Sy_W \end{pmatrix} = \begin{pmatrix} x_P \\ Sx_W \end{pmatrix} = \begin{pmatrix} x_P \\ x_T \end{pmatrix} \quad (S6)$$

where  $x_T = Sx_W$  refers to the output of waste treatment sectors, i.e., the amount of waste treated, with the solution:

$$\begin{pmatrix} x_P \\ x_T \end{pmatrix} = \begin{pmatrix} I - A_P & -A_T \\ -SG_P & I - SG_T \end{pmatrix}^{-1} \begin{pmatrix} y_P \\ Sy_W \end{pmatrix} \quad (S7)$$

Finally, multiplication of  $G$ 's from the left gives the  $m \times n$  matrix referring to  $W^2F$  of products,  $W^2F_P$ , and  $m \times t$  matrix referring to  $W^2F$  of direct discharge from final demand sectors,  $W^2F_w$ :

$$(W^2F_P \quad W^2F_w) = (G_P \quad G_T) \begin{pmatrix} I - A_P & -A_T \\ -SG_P & I - SG_T \end{pmatrix}^{-1} \begin{pmatrix} \widehat{y_P} & 0 \\ 0 & \widehat{Sy_W} \end{pmatrix} \quad (S8)$$

### 2.1.2 Adjusting for imports

The flows of goods and waste in the Xiamen IO table include imports from other provinces and abroad. A straight application of the above footprint calculation without considering this fact could result in overestimating the footprints on Xiamen because the imports are not produced in Xiamen. To deal with this issue, we adjusted the flows for

imports along the Chenery–Moses model <sup>9</sup>. Denoting by  $y_{Import}$  the vector of imports, we define the share of import of a product in its total supply,  $m_i$ , as:

$$m_i = y_{Import} / (x_P + y_{Import}) \quad (S9)$$

With the import share thus defined,  $y_P$ , in (S7) is adjusted for imports by:

$$y_{Pd} = (1 - \widehat{m}) \sum y_P$$

resulting in equation (3) in the text. The corresponding adjustment for the flow of waste/wastewater was not necessary because of the absence of imports. With  $m_i$  and  $y_{Pd}$  thus obtained, (2) is adjusted for imports as:

$$(W^2 F_P \quad W^2 F_W) = (G_P^* \quad G_T^*) \left[ (I - (I - \widehat{m})) \begin{pmatrix} A_P & A_T^* \\ SG_P^* & SG_T^* \end{pmatrix} \right]^{-1} \begin{pmatrix} \widehat{y}_{Pd} & 0 \\ 0 & \widehat{Sy}_W \end{pmatrix} \quad (S10)$$

## 2.2 The W<sup>2</sup>IO table and other data

### 2.2.1 Production sector classification

The IO table in Xiamen contains 139 sectors (Table S2), with a water supply and production aggregated with wastewater treatment.

**Table S2 Production sector classification: Xiamen IO table**

| Sector                               | Sector                                          |
|--------------------------------------|-------------------------------------------------|
| 1 Crop cultivation                   | 37 Printing and record medium reproduction      |
| 2 Forestry                           | 38 Cultural, sporting and recreational products |
| 3 Livestock and products             | 39 Petroleum refining and nuclear fuel          |
| 4 Fishery                            | 40 Coking                                       |
| 5 Technical services for agriculture | 41 Raw chemical materials                       |
| 6 Coal mining and processing         | 42 Chemical fertilizers                         |
| 7 Crude petroleum and natural gas    | 43 Chemical pesticides                          |
| 8 Ferrous metal ore mining           | 44 Chemicals for painting, dyeing and others    |
| 9 Non-ferrous metal ore mining       | 45 Synthetic chemicals                          |



|    |                                                                                      |    |                                                                    |
|----|--------------------------------------------------------------------------------------|----|--------------------------------------------------------------------|
| 10 | Non-metallic minerals and other mining<br>Mining auxiliary services and other mining | 46 | Chemicals for special usages                                       |
| 11 | products                                                                             | 47 | Surfactant Detergent & Cosmetics                                   |
| 12 | Grain mill products                                                                  | 48 | Medical and pharmaceutical products                                |
| 13 | Feeding stuff production                                                             | 49 | Chemical fibers                                                    |
| 14 | Vegetable oil and forage                                                             | 50 | Rubber products                                                    |
| 15 | Sugar refining                                                                       | 51 | Plastic products                                                   |
| 16 | Slaughtering and meat processing                                                     | 52 | Cement, lime and gypsum                                            |
| 17 | Prepared fish and seafood                                                            | 53 | Cement products and other similar products                         |
| 18 | Vegetable, fruit and nut processing                                                  | 54 | Brick, tile, stone and other building materials                    |
| 19 | Convenient foods                                                                     | 55 | Glass and glass products                                           |
| 20 | Liquid milk and dairy products                                                       | 56 | Ceramic products                                                   |
| 21 | Spices and fermentation products                                                     | 57 | Fireproof products                                                 |
| 22 | Other food manufacturing                                                             | 58 | Other non-metallic mineral products                                |
| 23 | Wines, spirits and liquors                                                           | 59 | Iron smelting                                                      |
| 24 | Non-alcoholic beverage                                                               | 60 | Steel smelting                                                     |
| 25 | Tobacco products                                                                     | 61 | Iron alloy smelting                                                |
| 26 | Cotton textiles                                                                      | 62 | Nonferrous metal smelting                                          |
| 27 | Woolen textiles                                                                      | 63 | Nonferrous metal processing                                        |
| 28 | Hemp textiles                                                                        | 64 | Metal products                                                     |
| 29 | Finished textile products                                                            | 65 | Boiler, engines and turbine                                        |
| 30 | Knitted mills                                                                        | 66 | Metalworking machinery                                             |
| 31 | Wearing apparel                                                                      | 67 | Lifting transport equipment<br>Pump, valve, compressor and similar |
| 32 | Leather, furs, down and related products                                             | 68 | machinery                                                          |
| 33 | Shoes                                                                                | 69 | Culture, office machinery                                          |
|    | Sawmills, fiberboard, and products of wood,                                          |    | Mining, metallurgy and construction                                |
| 34 | bamboo, cane, palm, straw, etc.                                                      | 71 | equipment                                                          |
|    |                                                                                      |    | Chemical engineering, wood and non-                                |
| 35 | Furniture                                                                            | 72 | metallic processing equipment                                      |
|    |                                                                                      |    | Cultivation, forestry, animal husbandry and                        |
| 36 | Paper and paper products                                                             | 73 | fishery machinery                                                  |

| Sector | Sector                       |
|--------|------------------------------|
| 74     | Other special equipment      |
| 75     | Motor vehicles               |
| 76     | Components for vehicles      |
| 77     | Railroad transport equipment |
| 78     | Ship building                |
| 79     | Other transport machinery    |
| 80     | Generators                   |
| 108    | Tube transportation          |
| 109    | Service agent                |
| 110    | Warehousing                  |
| 111    | Post                         |
| 112    | Hotel                        |
| 113    | Eating and drinking places   |
| 114    | Telecommunication            |

---

|     |                                              |     |                                         |
|-----|----------------------------------------------|-----|-----------------------------------------|
|     | Power transmission, distribution and control |     |                                         |
| 81  | equipment                                    | 115 | Software                                |
| 82  | Cable and electrical materials               | 116 | Finance                                 |
| 83  | Battery                                      | 117 | Financial market                        |
| 84  | Household appliances                         | 118 | Insurance                               |
| 85  | Other electric machinery and equipment       | 119 | Real estate                             |
| 86  | Electronic computer                          | 120 | Leasehold                               |
| 87  | Communication equipment                      | 121 | Business services                       |
| 88  | Radar and broadcasting equipment             | 122 | Scientific research and experiment      |
| 89  | Household audio-visual equipment             | 123 | Special technical services              |
|     |                                              |     | Science & technology exchange and       |
| 90  | Electronic elements and devices              | 124 | promotion services                      |
| 91  | Other electronic equipment                   | 125 | Water conservancy                       |
| 92  | Instruments and measuring equipment          | 126 | Environmental management                |
| 93  | Other manufactured products                  | 127 | Public infrastructure management        |
| 94  | Scrap and waste recycling                    | 128 | Residential services                    |
| 95  | Repair of metal products and machinery       | 129 | Other social services                   |
| 96  | Electricity and heat production and supply   | 130 | Education services                      |
| 97  | Gas production and supply                    | 131 | Health services                         |
| 98  | Water production and supply                  | 132 | Social welfare                          |
| 99  | Construction                                 | 133 | News press                              |
| 100 | Civil engineering                            | 134 | Radio, television, film and audio-video |
| 101 | Installation                                 | 135 | Culture and arts                        |
| 102 | Decoration                                   | 136 | Sports                                  |
| 103 | Wholesale and retail trade                   | 137 | Recreational services                   |
| 104 | Railway transportation                       | 138 | Social security                         |
|     |                                              |     | Public administration and social        |
| 105 | Road transportation                          | 139 | organization                            |
| 106 | Water transportation                         |     |                                         |
| 107 | Air transportation                           |     |                                         |

---

### 2.2.2 Correction of the original IO data with RAS

In the original IO table of Xiamen, "Road transport" ranks as the second-largest intermediate user (365.57 million RMB) of "Crop cultivation" after "Vegetable oil and forage" (624.79 million RMB). However, the corresponding entry in the National IO tables for China was 0 for both the 2012 and 2017 tables. Furthermore, we were not able to find any local data supporting the presence of this large transaction. Accordingly,

footprint calculation based on the original IO table produced results that are difficult to interpret. We, therefore, decided to replace the entry of this cell with zero. To maintain consistency in the accounting of the resulting IO table, the matrix of input coefficients was subjected to adjustments by the RAS method <sup>9</sup>.

### **2.2.3 Data used to develop the W<sup>2</sup>IO table for Xiamen**

The data in Panel A of “Treatment”, excluding sludge landfill and incineration, were obtained from XEPB (2012)<sup>10</sup>. For sludge incineration and landfilling, the corresponding data on municipal solid waste was used. The data on sludge composting was obtained from the actual operation data of sludge composting. Using data on investment expenditure and operating costs of WWTPs <sup>10</sup>, we extracted the data on wastewater treatment separately from the IO table.

The data on wastewater and COD in Panel B of “Production” was obtained from XPSO (2011)<sup>11</sup>. Agriculture is a non-point source of pollution. Agricultural cultivation and fisheries are not included in the domestic sewage pipe network. Only a small amount of large-scale farming wastewater enters the WWTP pipeline. The data on wastewater treatment capacity, sludge generation, and COD were obtained from the annual operation data provided by the Xiamen Municipal Construction Group. Finally, the data on wastewater and COD in Panel B of “Final demand” was obtained from CCNPS (2011)<sup>12</sup>, a booklet that gives the factors for wastewater generated by residents in China, divided into five major categories. Xiamen city belongs to the first category of the second district in China and is in the same category as Shanghai, Guangzhou, and Hangzhou.

**Table S3 The allocation matrix *S* of waste/wastewater to treatment processes**

| Treatment    | Waste/wastewater |           |           |           |      |
|--------------|------------------|-----------|-----------|-----------|------|
|              | Wastewater       | Sludge 90 | Sludge 80 | Sludge 60 | Ash  |
| A2O          | 0.19             | 0.00      | 0.00      | 0.00      | 0.00 |
| OD           | 0.43             | 0.00      | 0.00      | 0.00      | 0.00 |
| BF           | 0.38             | 0.00      | 0.00      | 0.00      | 0.00 |
| Dewater80    | 0.00             | 0.36      | 0.00      | 0.00      | 0.00 |
| Dewater60    | 0.00             | 0.64      | 0.00      | 0.00      | 0.00 |
| landfill     | 0.00             | 0.00      | 0.00      | 0.89      | 1.00 |
| Incineration | 0.00             | 0.00      | 1.00      | 0.11      | 0.00 |

**Table S4 The W<sup>2</sup>IO table of Xiamen based on the framework in Table 1.**

|                  |              |         | Production |           |          |         | Treatment |        |        |       |       |          |              |          | Final demand |
|------------------|--------------|---------|------------|-----------|----------|---------|-----------|--------|--------|-------|-------|----------|--------------|----------|--------------|
|                  |              |         | Primary    | Secondary | Tertiary | Compost | A2O       | OD     | BF     | Dew80 | Dew60 | Landfill | Incineration |          |              |
| production       | Primary      | Panel A | 37593      | 533884    | 36901    | 0       | 0         | 0      | 0      | 0     | 0     | 0        | 0            | 888910   |              |
|                  | Secondary    |         | 64679      | 31228532  | 3346075  | 126     | 2033      | 4529   | 4094   | 272   | 1517  | 10       | 974          | 50110665 |              |
|                  | Tertiary     |         | 57494      | 9060617   | 9544181  | 0       | 277       | 638    | 554    | 0     | 0     | 0        | 0            | 8533767  |              |
|                  | Compost      |         | 98         | 0         | 0        | 0       | 0         | 0      | 0      | 0     | 0     | 0        | 0            | 0        |              |
| wastewater/waste | wastewater   | Panel B | 1          | 3024      | 3153     | 0       | 0         | 0      | 0      | 0     | 0     | 2        | 0            | 14903    |              |
|                  | sludge 90    |         | 0          | 0         | 0        | 0       | 203604    | 509028 | 343604 | 0     | 0     | 0        | 0            | 0        |              |
|                  | sludge 80    |         | 0          | 0         | 0        | -30080  | 0         | 0      | 0      | 47054 | 0     | 0        | 0            | 0        |              |
|                  | sludge 60    |         | 0          | 0         | 0        | 0       | 0         | 0      | 0      | 0     | 75723 | 0        | 0            | 0        |              |
|                  | ash          |         | 0          | 0         | 0        | 0       | 0         | 0      | 0      | 0     | 0     | 0        | 5090         | 0        |              |
|                  | Effluents    | COD     | 4          | 8896      | 7472     | 0       | 1326      | 2309   | 2742   | 0     | 0     | 2        | 0            | 50669    |              |
| Treatment        | A2O          | Part C  | 0          | 562       | 585      | 0       | 0         | 0      | 0      | 0     | 0     | 0        | 0            | 2767     |              |
|                  | OD           |         | 0          | 1312      | 1368     | 0       | 0         | 0      | 0      | 0     | 0     | 1        | 0            | 6466     |              |
|                  | BF           |         | 0          | 1150      | 1199     | 0       | 0         | 0      | 0      | 0     | 0     | 1        | 0            | 5669     |              |
|                  | Dew80        |         | 0          | 0         | 0        | 0       | 72809     | 182028 | 122873 | 0     | 0     | 0        | 0            | 0        |              |
|                  | Dew60        |         | 0          | 0         | 0        | 0       | 130795    | 327000 | 220731 | 0     | 0     | 0        | 0            | 0        |              |
|                  | landfill     |         | 0          | 0         | 0        | 0       | 0         | 0      | 0      | 0     | 67242 | 0        | 5090         | 0        |              |
|                  | Incineration |         | 0          | 0         | 0        | -30080  | 0         | 0      | 0      | 47054 | 8481  | 0        | 0            | 0        |              |

Units: 10<sup>3</sup>kg for sludge, ash and COD, 10<sup>7</sup> kg for wastewater, and 10 k RMB for the monetary flows in the “industry” rows. The latter include imports. The bottom panel (Panel C) gives the flow of waste/wastewater converted to the flow of treatment via allocation matrix in Table S2.

The upper panel (Panel A) represents the flow of goods and services during production, wastewater/waste treatment sectors, and the final demand in monetary units, whereas the middle panel (Panel B) with the rows referring to waste/wastewater represents the flow of waste/wastewater generated in physical units. Panel C gives the flow of waste/wastewater converted by the allocation matrix S in Table S2 to the flow among treatment sectors. This converts wastewater discharges into inputs of wastewater treatment services, the generation of raw sludge from wastewater treatment sectors into the generation of dewatering activities, the generation of dewatered sludge into the inputs of incineration and landfill, and the input of sludge into composting as a negative input of incineration because the sludge is incinerated when not recycled as compost.

For instance, of 30 Mt of wastewater discharged from secondary sectors, 11.5 Mt is sent to BF, 13 Mt to OD, and the rest to A2O. Of the 203 kt of raw sludge generated by A2O, 13 kt (64%) is sent to Dew 60, with the rest being sent to Dew 80. Approximately 89% of Sludge 60 is landfilled, with the rest being directly incinerated. A sizable amount (64%) of Sludge 80 is used (recycled) in the composting sector as represented by its negative output in the sector. As Sludge 80 is otherwise incinerated (Table S3), its recycling in the form of composting and subsequent use as a substitute for fertilizers in the agricultural sector leads to a reduction in the amount of incinerated Sludge 80. This is represented in the bottom panel referring to treatment by the occurrence of a negative input of incineration in the composting sector. If not recycled, Sludge 80 would be incinerated (Table S3), leading to the generation of 5 kt of ash, which would then be landfilled.

## 2.2.4 COD from different sources of wastewater discharge

**Table S5 COD and wastewater discharge**

|                                           | Toilet | Kitchen | Bath-wash | Source          |
|-------------------------------------------|--------|---------|-----------|-----------------|
| COD (kg/y) EU                             | 27.5   | 16      | 3.7       | Ref 13          |
| Wastewater (m <sup>3</sup> /y) EU         | 19     | 18      | 18        | Ref 13          |
| Wastewater (m <sup>3</sup> /y): Singapore | 24     | 33      | 88        | Ref 14          |
| COD (kg/y) Xiamen                         | 12.76  | 17.64   | 5.44      | EU value Ref 13 |
|                                           |        |         |           | Singapore share |
| Wastewater (m <sup>3</sup> /y) Xiamen     | 8.82   | 19.84   | 26.46     | Ref 14          |

Due to the lack of Chinese data on COD by sources of wastewater discharge, we used the EU data on COD concentration of wastewater from toilets,  $27.5/19 = 1.45 \text{ kg/m}^3$ , provided by <sup>13</sup> Henze et al. (2002, Table 1.17). As for the share of wastewater discharge by sources, we used the data on Singapore (16% for toilet) taken from JWRC (2018) <sup>14</sup> instead of the EU value. This choice was made considering the similarity between Xiamen and Singapore in terms of the climatic zone and diet patterns. This resulted in the estimated share for Xiamen of toilet wastewater in total COD of 0.36.

## 2.2.5 Diet pattern, toilet discharge, and carbon content of food

**Table S6 Data on food (diet, toilet discharge, and carbon content)**

|                                      | Food consumption | Toilet discharge | Carbon content | Spanish diet |
|--------------------------------------|------------------|------------------|----------------|--------------|
| Units                                | kg/p/y           | l/kg             | 100g-C/g-food  | kg/p/y       |
| Source                               | Ref 15           | Ref 16           | Ref 17         | Ref 16       |
| Grain mill products                  | 41.9             | 20.5             | 32.7           | 41.9         |
| Vegetable oil and forage             | 8.9              | 20               | 76.7           | 22           |
| Slaughtering and meat processing     | 43.4             | 25               | 25.5           | 66           |
| Prepared fish and seafood            | 18.1             | 25.5             | 14.3           | 37           |
| Vegetable, fruit, and nut processing | 160.5            | 24               | 5.0            | 225          |
| Liquid milk and dairy products       | 12.8             | 25               | 6.3            | 143          |
| Other food                           | 6.4              | 19.5             | 32.7           | 6.4          |
| manufacturing                        |                  |                  |                |              |
| Wines, spirits and liquors           | 6.7              | 24               | 4.1            | 6.7          |
| Non-alcoholic beverage               | 2.7              | 24               | 4.1            | 2.7          |

## 2.3 Scenario analysis

Two scenarios were considered to assess the effects of possible changes in industrial structure and diet patterns. The first one (Scenario 1) is based on the rate of industrial growth prescribed in the 13th Five-Year Plan for economic and social development in Xiamen city. In that plan, sectors such as electronic information and mechanical manufacturing are expected to play a vital role in economic growth, with the output of

electronic information expected to increase from 0.3 trillion RMB in 2015 to 0.7 trillion RMB in 2020, or a 2.3-fold increase. To assess the impacts of planned industrial growth, we evaluated the effects on wastewater and sludge of the same 2.3-fold increase in the final demand for the products of 15 manufacturing sectors consisting of cars, ships, machinery, electronics, computer, and communication equipment. Denoting by  $DW_{S1}$ ,  $W2F_{S1}$ , and  $SF_{S1}$  the direct wastewater discharge, wastewater footprint, and sludge footprint under Scenario 1, respectively, we have

$$DW_{S1} = \sum_i r_i \times DW_i \quad (S11)$$

$$W2F_{S1} = \sum_i r_i \times W2F_i \quad (S12)$$

$$SF_{S1} = \sum_i r_i \times SF_i \quad (S13)$$

where  $r_i$  refers to the expected rate of change in the output of sector  $i$ .

The second scenario (Scenario 2) refers to a possible shift in diet from the traditional Chinese one mostly based on staples toward a European (Spanish) one involving larger amounts of animal-sourced foods. The evaluation was carried out by altering the consumption of "Vegetable oil and forage" "Slaughtering and meat processing", "Prepared fish and seafood", "Vegetable, fruit and nut processing," and "Liquid milk and dairy products" to the Spanish level (the last column of Table S3), and applying the same calculation as in Scenario 1.

## 2.4 Sensitivity analysis

To examine the robustness of the results, we conducted a sensitivity analysis for key parameters based on the sensitivity elasticity of parameters<sup>18-19</sup>, which indicates the ratio by which a change in "key parameters" changes the results,  $W^2F$  and  $SF$  in our case. The elasticity is given by

$$EL = \frac{\partial y}{\partial a} \times \frac{a}{y} \quad (S14)$$

where  $y$  denotes  $W^2F$  or  $SF$  and  $a$  the parameter under study. Among others,  $\theta_i$  and  $\alpha_j$  are considered as key parameters.



### 3 Results

#### 3.1 Direct discharge versus footprint

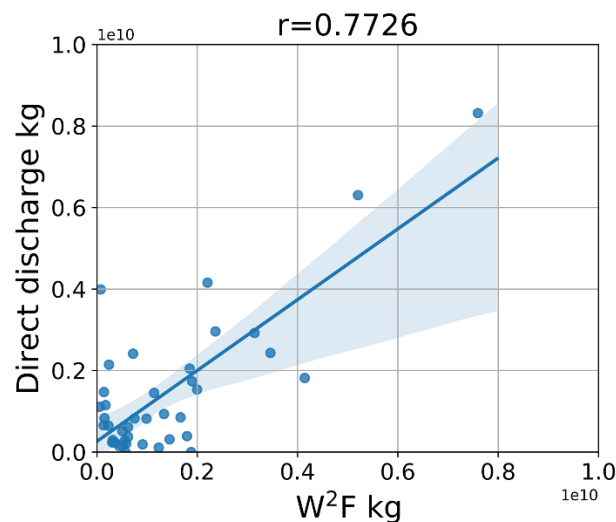

Figure S1 Direct discharge versus W²F of the largest 40 sector

#### 3.2 Wastewater and sludge footprint by final demand categories

In terms of final demand categories, the largest share of W²F (42%) is attributed to export, followed by urban household consumption (33%). The largest share of SF (78%) is attributed to urban household consumption, followed by export (10%) (Figure S2).

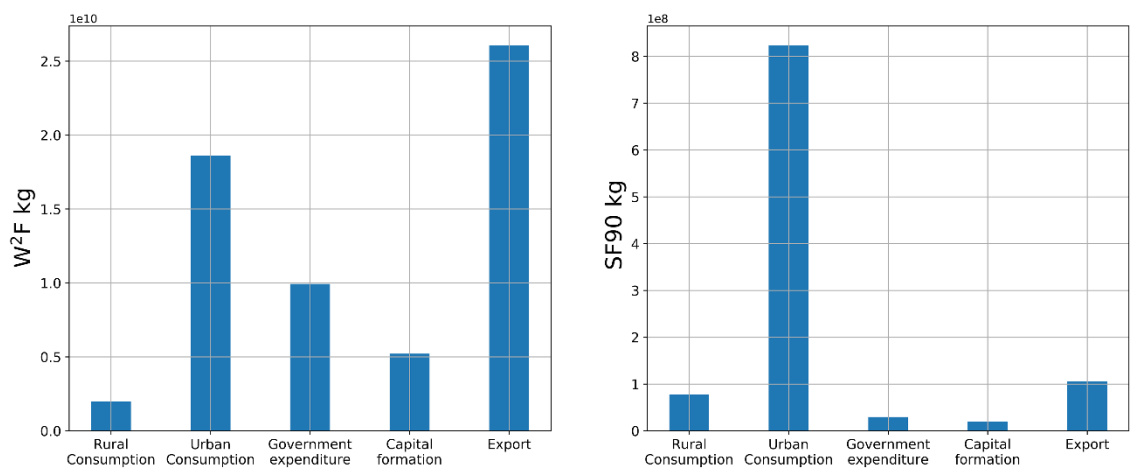

Figure S2 Wastewater and sludge footprint by final demand categories

### 3.3 Sensitivity analysis

#### 3.3.1 The sensitivity of pre-consumption W<sup>2</sup>F and SF to input and waste generation coefficients

Table S7 shows input and wastewater generation coefficients elasticities of pre-consumption W<sup>2</sup>F and SF, and gives the ratio by which a change in relevant coefficients changes W<sup>2</sup>F or SF. For instance, the value 0.000003 at the upper-left cell shows that a one % change in the input coefficient of electricity of the composting process changes the wastewater footprint by 0.000003, that is, practically no impact. The results indicate that for most cases the elasticities are small, with the occurrence of large elasticities concentrated to sludge generation coefficients. The largest one, 2.77, refers to the effects on sludge80 footprint of the sludge90 generation coefficients of Dew80, Dew60, landfill, and incineration treatment processes. It implies that a one % change in the coefficient change would induce a 2.77% change in SF of sludge80. Since these coefficients were directly obtained from data on the real operation of WWTPs in the city, they are of high reliability, implying the robustness of our results of SF.

**Table S7 Sensitivity elasticity of pre-consumption W<sup>2</sup>F and SF to input and waste generation coefficients**

| Footprint<br>Coefficients |              | Wastewater | Sludge90 | Sludge80 | Sludge60 |
|---------------------------|--------------|------------|----------|----------|----------|
| Electricity               | Compost      | 0.000003   | 0.000000 | 0.000002 | 0.000001 |
|                           | A2O          | 0.000037   | 0.000000 | 0.000029 | 0.000011 |
|                           | OD           | 0.000082   | 0.000000 | 0.000066 | 0.000024 |
|                           | BF           | 0.000068   | 0.000000 | 0.000055 | 0.000020 |
|                           | Dew80        | 0.000002   | 0.000000 | 0.000002 | 0.000001 |
|                           | Dew60        | 0.000004   | 0.000000 | 0.000003 | 0.000001 |
|                           | Landfill     | 0.000000   | 0.000000 | 0.000000 | 0.000000 |
|                           | Incineration | 0.000002   | 0.000000 | 0.000001 | 0.000001 |
|                           |              |            |          |          |          |
| Wastewater                | Compost      | 0.000000   | 0.000000 | 0.000000 | 0.000000 |
|                           | A2O          | 0.000000   | 0.000000 | 0.000000 | 0.000000 |
|                           | OD           | 0.000000   | 0.000000 | 0.000000 | 0.000000 |
|                           | BF           | 0.000000   | 0.000000 | 0.000000 | 0.000000 |

|          |              |           |          |           |           |
|----------|--------------|-----------|----------|-----------|-----------|
|          | Dew80        | 0.000000  | 0.000000 | 0.000000  | 0.000000  |
|          | Dew60        | 0.000000  | 0.000000 | 0.000000  | 0.000000  |
|          | Landfill     | 0.000280  | 0.000000 | 0.000000  | 0.000000  |
|          | Incineration | 0.000280  | 0.000000 | 0.000227  | 0.000082  |
| Sludge90 | Compost      | 0.000000  | 0.000000 | 0.000000  | 0.000000  |
|          | A2O          | 0.000000  | 0.192764 | 0.000000  | 0.000000  |
|          | OD           | 0.000062  | 0.481927 | 0.534416  | 0.192783  |
|          | BF           | 0.000216  | 0.325310 | 1.870517  | 0.674760  |
|          | Dew80        | 0.000321  | 0.000000 | 2.772421  | 1.000108  |
|          | Dew60        | 0.000321  | 0.000000 | 2.772421  | 1.000108  |
|          | Landfill     | 0.000321  | 0.000000 | 2.772421  | 1.000108  |
|          | Incineration | 0.000321  | 0.000000 | 2.772421  | 1.000108  |
| Sludge80 | Compost      | 0.000000  | 0.000000 | -1.772122 | 0.000000  |
|          | A2O          | -0.000026 | 0.000000 | -1.772143 | -0.000007 |
|          | OD           | -0.000026 | 0.000000 | -1.772143 | -0.000007 |
|          | BF           | -0.000026 | 0.000000 | -1.772143 | -0.000007 |
|          | Dew80        | -0.000026 | 0.000000 | 0.999976  | -0.000007 |
|          | Dew60        | 0.000015  | 0.000000 | 1.000013  | 0.000004  |
|          | Landfill     | 0.000015  | 0.000000 | 1.000013  | 0.000004  |
|          | Incineration | 0.000015  | 0.000000 | 1.000013  | 0.000004  |
| Sludge60 | Compost      | 0.000000  | 0.000000 | 0.000000  | 0.000000  |
|          | A2O          | 0.000000  | 0.000000 | 0.000000  | 0.000000  |
|          | OD           | 0.000000  | 0.000000 | 0.000000  | 0.000000  |
|          | BF           | 0.000000  | 0.000000 | 0.000000  | 0.000000  |
|          | Dew80        | 0.000000  | 0.000000 | 0.000000  | 0.000000  |
|          | Dew60        | 0.000000  | 0.000000 | 0.000000  | 1.000000  |
|          | Landfill     | 0.000267  | 0.000000 | 0.000217  | 1.000090  |
|          | Incineration | 0.000267  | 0.000000 | 0.000217  | 1.000090  |

Note: The first and second columns show the names of input and waste generation coefficient. The first row show the names of wastewater and sludge footprints.

### 3.3.2 The sensitivity of post-consumption W<sup>2</sup>F and SF to key parameters

Table S8 shows the sensitivity elasticities of post-consumption W<sup>2</sup>F and SF to key parameters,  $\theta_i$  and  $\alpha_j$ . The first block shows the effects of a change in the discharge rate of toilet water associated with the excretion of food item  $i$ , that is,  $\theta_i$ , on post-

consumption WWF. For instance, the value 0.12 of the upper-left cell indicates that a one percent change in the amount of discharge of toilet water associated with the excretion of grain mill products results in a 0.12% change in the amount of post-consumption W<sup>2</sup>F. The results indicate that the elasticities are rather small, with none exceeding 0.6. The largest value is observed for "Vegetable, fruits, and nut processing" on post SF, because of its largest share (53%) in the total mass food consumption.

The second block of Table S7 shows the impacts of a change in the ratio of raw sludge to total COD,  $\alpha_j$ , of the three WWTPs on the amount of post-consumption W<sup>2</sup>F. The results indicate that the amount of post-consumption W<sup>2</sup>F is relatively sensitive to the parameter of OD treatment, which can be explained by that its treatment capacity is larger than the other two treatment processes. The parameter is obtained from annual WWTPs operation data in the city and hence is of high credibility, implying the robustness of our post-consumption SF results.

**Table S8 Sensitivity elasticity of post-consumption W<sup>2</sup>F and SF with respect to key parameters**

| Footprint<br>Parameters |                                     | Wastewater | Sludge90 |
|-------------------------|-------------------------------------|------------|----------|
| $\theta_i$              | Grain mill products                 | 0.12       |          |
|                         | Vegetable oil and forage            | 0.03       |          |
|                         | Slaughtering and meat processing    | 0.15       |          |
|                         | Prepared fish and seafood           | 0.06       |          |
|                         | Vegetable, fruit and nut processing | 0.54       |          |
|                         | Liquid milk and dairy products      | 0.05       |          |
|                         | Other food manufacturing            | 0.02       |          |
|                         | Wines, spirits and liquors          | 0.02       |          |
|                         | Non-alcoholic beverage              | 0.01       |          |
| $\alpha_j$              | A2O                                 |            | 0.19     |
|                         | OD                                  |            | 0.48     |
|                         | BF                                  |            | 0.33     |

Note: The first and second columns show the parameters. The first row show the names of wastewater technology and sludge footprints.

### 3.4 Transboundary impacts

In the literature on carbon footprint based on multi-regional input-output (MRIO) analysis it is common to look at the impacts embodied in trade. While the current IO data is a single region one, it is possible to estimate the amounts of wastewater and sludge embodied in trade, assuming that the technology of the exporting countries is the same as that of Xiamen, that is,  $\hat{m} = 0$  in (S10). The results in Table S9 indicate that Xiamen is a net exporter of wastewater and sludge, although the extent of “trade surplus” for the latter is much smaller. It is not the case that the city is keeping its own water resources clean at the expense of other regions of China.

**Table S9 Wastewater and sludge embodied in trade**

|                         | Embodied in export | Embodied in import |
|-------------------------|--------------------|--------------------|
| Wastewater ( $10^7$ kg) | 6778               | 5813               |
| Sludge90 ( $10^3$ kg)   | 291741             | 274283             |

## References

- (1) Zhang, Q.H.; Yang, W.N.; Ngo, W.N.; Guo, W.S.; Jin, P.K.; Dzakupasu, M.; Yang, S.J.; Wang, Q.; Wang, X.C.; Ao, D. Current status of urban wastewater treatment plants in China. *Environ Int.* **2016**, 92-93: 11-22.
- (2) MOHURD (Ministry of Housing and Urban-Rural Development of People’s Republic of China), **2007**. The disposal of Sludge from Municipal Wastewater Treatment Plant-Sludge Quality for Co-landfilling (CJ/T 249-2007). (In Chinese)
- (3) Yang, G.; Zhang, G.; Wang, H. Current state of sludge production, management, treatment and disposal in China. *Water Research.* **2015**, 78: 60-73.
- (4) MEE(Ministry of Ecology and Environment of People’s Republic of China). Guideline on Best Available Technologies of Pollution Prevention and Control for Treatment and Disposal of Sludge from Municipal Wastewater Treatment Plant. **2010**. (In Chinese).
- (5) GSC (General Office of the State Council). Pilot Work Plan for the Construction of **Zero-waste** Cities. 2018. In Chinese.
- (6) Nakamura, S.; Kondo, Y. Waste Input-Output Analysis: Concepts and Application to Industrial Ecology. Springer. **2009**.
- (7) Nakamura, S.; Kondo, Y. Input-Output Analysis of Waste Management. *J Ind Ecol.* **2002**, 6(1): 39–63.
- (8) Nakamura, S.; Nansai, K. “Input–output and hybrid LCA,” in *Special types of life cycle*

- assessment*, Ed.M. Finkbeiner Springer, **2016**.
- (9) Miller, R.E.; Blair, P.D. Input-output analysis: Foundations and Extensions. UK, Cambridge University Press. **2009**
  - (10) XEPB (Xiamen Environmental Protection Bureau). Xiamen Annual Environmental statistics report. **2012**. (In Chinese)
  - (11) XPSO (Xiamen Pollution Survey Office). Technical report of the pollution Survey in Xiamen City, Fujian Province. 2011. (In Chinese)
  - (12) CCNPS (Compilation Committee for National Pollution Survey). Household Discharge Coefficient and Use Instructions. China Environmental Science Press. **2011**. (in Chinese)
  - (13) Henze, M.; Harremoës, P.; Jansen, J.; Arvin, E. Wastewater treatment. Biological and chemical processes. 3rd ed. Berlin, Springer, **2002**.
  - (14) JWRC. Japan Water Research Center. [http://www.jwrc-net.or.jp/map/shiyouyou\\_map.html](http://www.jwrc-net.or.jp/map/shiyouyou_map.html). (In Japanese).
  - (15) XSB (Xiamen Statistic Bureau). Yearbook of Xiamen Special Economic Zone. 2013. [http://202.109.255.156:8130/files\\_pub/publish/2013/2013/main0.htm](http://202.109.255.156:8130/files_pub/publish/2013/2013/main0.htm). (In Chinese)
  - (16) Munoz, I.; Canals, L.; Clift, R. Consider a Spherical Man. *J Ind Ecol.* **2008**, 12: 521-537.
  - (17) Yan, Z.; Cui, S.; Li, G.; Ren, Y. Dynamics and Environmental Load of Food Carbon Consumption During Urbanization: A Case Study of Xiamen City, China. *Environmental Science.* **2013**, 34(4): 1636-1644. (In Chinese)
  - (18) Heijungs, R.; Lenzen, M. Error propagation methods for LCA - a comparison. *Int J Life Cycle Ass.* **2014**, 19(7): 1445-1461.
  - (19) Lin, C.; Qi, J.; Liang, S.; Feng, C.; Wiedmann, T.; Liao, Y.; Yang, X.; Li, Y.; Mi, Z.; Yang, Z. Saving less in China facilitates global CO2 mitigation. *Nat. Commun.* **2020**, 11: 1-12.
